# Supplementary material for: An Analysis of PCR Ct Scores and Distributions from the ONS Community Infection Survey during the COVID Second Wave in the UK
Source: bioRxiv or medRxiv preprint supplement (doi:10.1101/2022.06.03.22275903), 2022-06-04

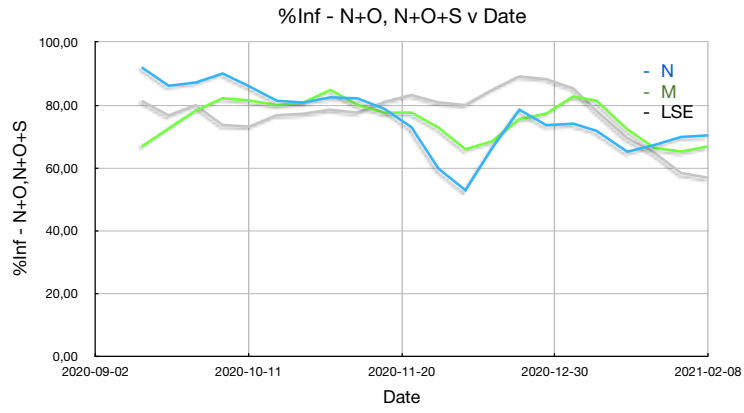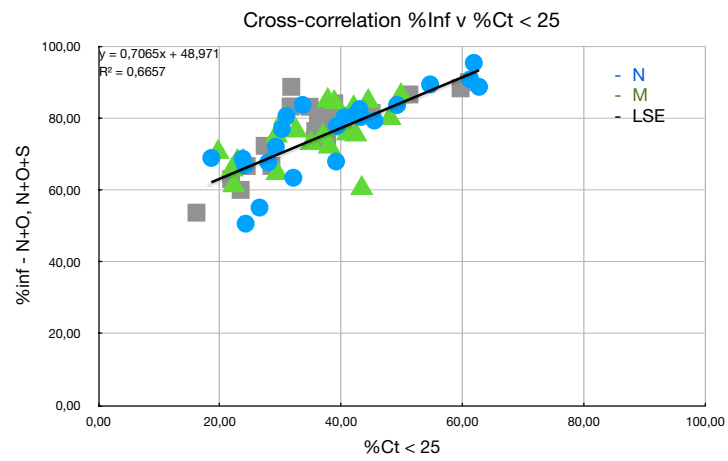

# North

Table 1

| Date       | %Ct < 25 YH - S | %Ct < 25 YH - C | %Ct < 25 NE - C | %Ct < 25 NW - C | Mean  | %Q-N - S | %Q-N-S - S | %Int YH - S | %Int YH - C | %Int NE - C | %Int NW - C | Mean  |       |       |
|------------|-----------------|-----------------|-----------------|-----------------|-------|----------|------------|-------------|-------------|-------------|-------------|-------|-------|-------|
| 2020-09-07 |                 | 65.88           | 49.98           | 69.93           | 61.86 |          |            |             |             | 100.00      | 100.00      | 86.00 | 95.33 |       |
| 2020-09-14 |                 |                 | 59.63           | 74.88           | 53.67 | 62.73    |            |             |             | 84.00       | 89.00       | 93.00 | 88.67 |       |
| 2020-09-21 | 59.08           | 59.08           | 48.80           | 60.77           | 48.19 | 49.21    | 0.91       | 76.52       | 77.44       | 77.44       | 78.00       | 93.00 | 83.61 |       |
| 2020-09-28 | 58.16           | 58.16           | 57.68           | 69.19           | 60.07 | 61.27    | 0.96       | 82.61       | 80.32       | 80.32       | 90.00       | 86.00 | 90.75 |       |
| 2020-10-05 | 49.41           | 48.41           | 48.58           | 64.37           | 56.26 | 54.66    | 13.20      | 73.20       | 86.40       | 86.40       | 90.00       | 92.00 | 89.35 |       |
| 2020-10-12 | 39.79           | 39.79           | 46.21           | 41.38           | 44.69 | 43.02    | 6.14       | 75.74       | 81.88       | 81.88       | 84.00       | 81.00 | 82.47 |       |
| 2020-10-19 | 47.56           | 47.56           | 47.05           | 33.83           | 44.65 | 43.27    | 7.47       | 74.68       | 82.16       | 82.16       | 83.00       | 70.00 | 86.00 | 89.29 |
| 2020-10-26 | 44.90           | 44.90           | 45.51           | 35.4            | 44.20 | 42.50    | 7.61       | 73.61       | 81.23       | 81.23       | 82.00       | 78.00 | 86.00 | 81.31 |
| 2020-11-02 | 35.28           | 35.28           | 35.99           | 25.17           | 38.11 | 33.64    | 13.78      | 73.76       | 87.52       | 87.52       | 84.00       | 79.00 | 84.00 | 83.63 |
| 2020-11-09 | 31.75           | 31.75           | 32.92           | 27.86           | 31.43 | 30.99    | 10.30      | 69.10       | 79.40       | 79.40       | 78.00       | 88.00 | 79.00 | 80.60 |
| 2020-11-16 | 38.22           | 38.22           | 37.67           | 45.23           | 38.78 | 35.22    | 8.04       | 68.61       | 74.88       | 74.88       | 75.00       | 85.00 | 73.00 | 79.97 |
| 2020-11-23 | 17.73           | 17.73           | 18.15           | 17.24           | 21.29 | 18.60    | 9.38       | 62.18       | 71.56       | 71.56       | 69.00       | 65.00 | 70.00 | 69.89 |
| 2020-11-30 | 13.33           | 13.33           | 20.35           | 46.92           | 16.43 | 24.26    | 8.51       | 41.93       | 51.44       | 51.44       | 49.00       | 46.00 | 56.00 | 50.61 |
| 2020-12-07 | 25.45           | 25.45           | 23.28           | 31.17           | 26.31 | 26.55    | 6.06       | 49.26       | 56.32       | 56.32       | 53.00       | 53.00 | 59.00 | 55.08 |
| 2020-12-14 | 34.09           | 34.09           | 36.60           | 38.75           | 44.70 | 39.28    | 23.01      | 69.01       | 82.02       | 82.02       | 77.00       | 78.00 | 77.00 | 77.75 |
| 2020-12-21 | 45.34           | 45.34           | 46.40           | 48.63           | 42.52 | 45.47    | 26.74      | 64.35       | 81.08       | 81.08       | 79.00       | 86.00 | 72.00 | 79.27 |
| 2020-12-28 | 30.50           | 30.50           | 38.11           | 41.83           | 46.20 | 38.16    | 30.48      | 40.09       | 70.57       | 70.57       | 63.00       | 64.00 | 74.00 | 67.89 |
| 2021-01-04 | 38.14           | 38.14           | 36.41           | 45.19           | 46.42 | 45.34    | 34.22      | 42.61       | 76.86       | 76.86       | 73.00       | 90.00 | 81.00 | 80.21 |
| 2021-01-10 | 23.44           | 23.44           | 28.72           | 33.82           | 42.52 | 32.12    | 39.18      | 46.37       | 55.53       | 55.53       | 56.00       | 73.00 | 69.00 | 69.38 |
| 2021-01-18 | 21.64           | 21.64           | 27.56           | 5.6             | 37.70 | 24.13    | 48.91      | 22.51       | 71.41       | 71.41       | 64.00       | 59.00 | 76.00 | 66.85 |
| 2021-01-25 |                 |                 | 21.30           | 24.98           | 38.29 | 27.99    |            |             |             |             | 61.00       | 71.00 | 71.00 | 67.67 |
| 2021-02-01 |                 |                 | 32.51           | 26.58           | 28.60 | 29.23    |            |             |             |             | 67.00       | 78.00 | 71.00 | 72.00 |
| 2021-02-08 |                 |                 | 25.48           | 21.49           | 24.32 | 23.76    |            |             |             |             | 73.00       | 64.00 | 69.00 | 68.67 |

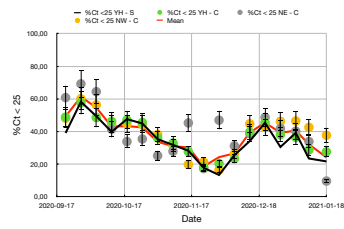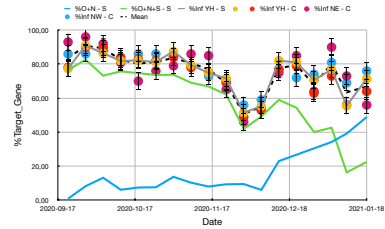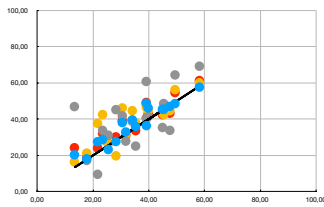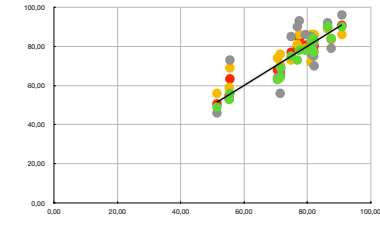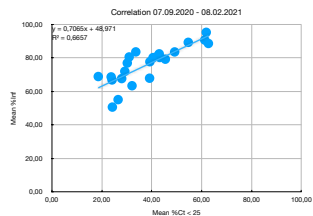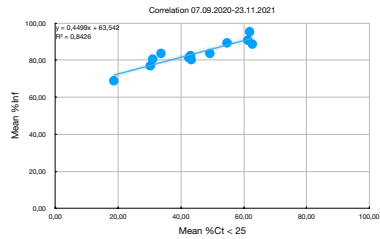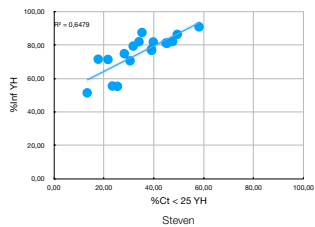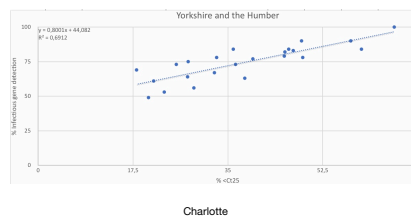

# Midlands

Table 1

| Date       | %CI < 25 WM - S | %CI < 25 WM - C | %CI < 25 EM - C | %CI < 25 SW - C | Mean  | %O-N - S | %O-N-S - S | %Int WM - S | %Int WM - C | %Int EM - C | %Int SW - C | Mean  |       |       |
|------------|-----------------|-----------------|-----------------|-----------------|-------|----------|------------|-------------|-------------|-------------|-------------|-------|-------|-------|
| 2020-09-07 |                 |                 | 49.39           | 72.28           | 8.51  | 43.39    |            |             |             | 50.00       | 71.00       | 60.50 |       |       |
| 2020-09-14 |                 |                 | 51.25           | 24.04           | 29.81 | 35.03    |            |             |             | 85.00       | 67.00       | 73.00 |       |       |
| 2020-09-21 | 50.43           | 50.43           | 48.01           | 25.79           | 27.84 | 38.02    | 11.66      | 82.46       | 94.12       | 94.12       | 91.00       | 60.00 | 43.00 | 72.00 |
| 2020-09-28 | 49.29           | 49.29           | 44.48           | 34.13           | 31.50 | 38.96    | 8.12       | 81.33       | 89.45       | 89.45       | 89.00       | 75.00 | 84.00 | 69.56 |
| 2020-10-05 | 51.30           | 51.30           | 47.32           | 62.28           | 31.36 | 48.07    | 6.99       | 77.80       | 84.80       | 84.80       | 83.00       | 87.00 | 65.00 | 79.95 |
| 2020-10-12 | 46.96           | 46.96           | 48.14           | 45.24           | 27.91 | 42.06    | 3.48       | 80.28       | 83.73       | 83.73       | 84.00       | 81.00 | 83.00 | 82.93 |
| 2020-10-19 | 40.87           | 40.87           | 41.29           | 41.80           | 33.27 | 39.31    | 5.93       | 73.15       | 79.08       | 79.08       | 76.00       | 76.00 | 77.00 | 77.02 |
| 2020-10-26 | 48.70           | 48.70           | 47.00           | 40.67           | 41.46 | 44.46    | 6.01       | 81.62       | 87.62       | 87.62       | 83.00       | 82.00 | 86.00 | 84.66 |
| 2020-11-02 | 34.78           | 34.78           | 38.07           | 39.30           | 39.02 | 37.79    | 7.27       | 81.69       | 88.96       | 88.96       | 84.00       | 80.00 | 87.00 | 84.99 |
| 2020-11-09 | 36.52           | 36.52           | 35.69           | 36.68           | 39.05 | 36.99    | 12.15      | 66.16       | 78.30       | 78.30       | 74.00       | 74.00 | 71.00 | 75.08 |
| 2020-11-16 | 29.57           | 29.57           | 26.01           | 32.57           | 32.36 | 30.63    | 8.62       | 74.93       | 83.25       | 83.25       | 78.00       | 77.00 | 82.00 | 80.06 |
| 2020-11-23 | 34.78           | 34.78           | 32.14           | 22.79           | 26.63 | 29.34    | 6.89       | 74.70       | 83.39       | 83.39       | 78.00       | 61.00 | 73.00 | 75.10 |
| 2020-11-30 | 11.30           | 11.30           | 11.07           | 22.37           | 34.13 | 19.72    | 14.78      | 60.37       | 75.12       | 75.12       | 71.00       | 67.00 | 69.00 | 70.53 |
| 2020-12-07 | 26.96           | 26.96           | 24.39           | 26.29           | 11.82 | 22.31    | 13.63      | 48.43       | 62.06       | 62.06       | 62.00       | 73.00 | 48.00 | 61.26 |
| 2020-12-14 | 38.28           | 38.28           | 39.58           | 38.64           | 47.64 | 41.03    | 23.30      | 54.51       | 77.81       | 77.81       | 77.00       | 78.00 | 70.00 | 76.70 |
| 2020-12-21 | 46.96           | 46.96           | 40.41           | 51.74           | 30.57 | 42.42    | 47.38      | 34.17       | 81.55       | 81.55       | 80.00       | 84.00 | 56.00 | 75.39 |
| 2020-12-28 | 48.70           | 48.70           | 46.72           | 35.20           | 29.32 | 36.73    | 52.25      | 35.45       | 87.69       | 87.69       | 87.00       | 78.00 | 64.00 | 79.17 |
| 2021-01-04 | 61.74           | 61.74           | 59.79           | 30.73           | 47.18 | 46.86    | 79.05      | 16.31       | 86.23       | 86.23       | 85.00       | 79.00 | 78.00 | 80.31 |
| 2021-01-10 | 39.13           | 39.13           | 36.14           | 24.57           | 30.45 | 33.57    | 66.79      | 15.18       | 81.97       | 81.97       | 80.00       | 65.00 | 73.00 | 76.49 |
| 2021-01-18 | 20.87           | 20.87           | 30.60           | 25.56           | 18.38 | 23.85    | 60.06      | 15.25       | 77.31       | 77.31       | 70.00       | 69.00 | 58.00 | 68.08 |
| 2021-01-25 |                 |                 | 28.82           | 33.53           | 25.91 | 29.42    |            |             |             | 71.00       | 62.00       | 61.00 | 64.67 |       |
| 2021-02-01 |                 |                 | 26.28           | 29.97           | 9.92  | 22.05    |            |             |             | 68.00       | 70.00       | 65.67 |       |       |
| 2021-02-08 |                 |                 | 28.78           | 20.47           | 19.47 | 22.91    |            |             |             | 75.00       | 66.00       | 63.00 | 68.00 |       |

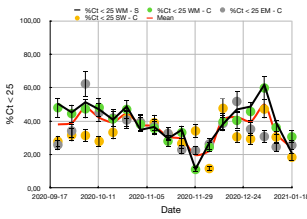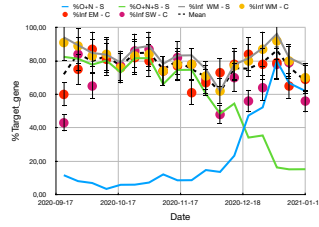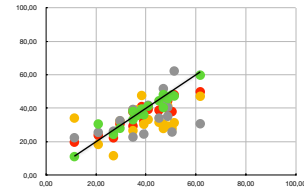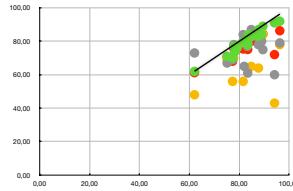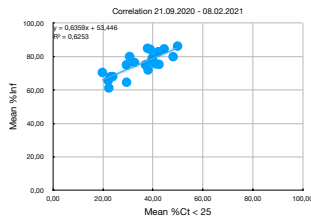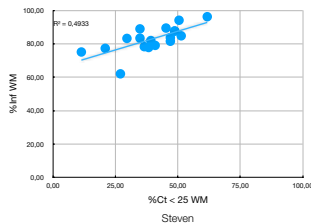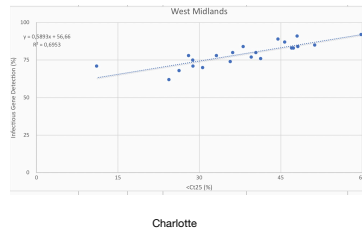

Table 1

| Date       | %CI < 25 L - S | %CI < 25 L - C | %CI < 25 SE - C | %CI < 25 EE - C | Mean  | %DI - S | %DI - S - S | %MI L - S | %MI L - C | %MI SE - C | %MI EE - C | Mean  |        |       |       |
|------------|----------------|----------------|-----------------|-----------------|-------|---------|-------------|-----------|-----------|------------|------------|-------|--------|-------|-------|
| 2020-09-07 | 0              | 0              | 41.40           | 22.81           | 31.12 | 31.78   |             |           |           |            |            | 81.00 | 100.00 | 85.00 | 88.67 |
| 2020-09-14 |                |                | 35.78           | 34.42           | 36.77 | 35.66   |             |           |           |            |            | 78.00 | 60.00  | 84.00 | 74.00 |
| 2020-09-21 | 36.37          | 36.37          | 41.07           | 29.77           | 38.16 | 36.34   | 13.28       | 79.95     | 63.23     | 93.23      | 91.00      | 60.00 | 60.00  | 73.00 | 79.31 |
| 2020-09-28 | 36.06          | 36.06          | 34.84           | 35.30           | 38.51 | 36.17   | 17.68       | 68.77     | 86.43     | 86.43      | 85.00      | 70.00 | 75.00  | 80.61 | 80.61 |
| 2020-10-05 | 29.85          | 29.85          | 36.16           | 19.20           | 28.8  | 28.51   | 14.26       | 52.04     | 66.30     | 66.30      | 67.00      | 43.00 | 35.00  | 65.65 | 65.65 |
| 2020-10-12 | 44.53          | 44.53          | 42.16           | 34.16           | 36.45 | 39.32   | 11.98       | 67.52     | 79.50     | 79.50      | 80.00      | 81.00 | 78.00  | 79.63 | 79.63 |
| 2020-10-19 | 33.34          | 33.34          | 33.72           | 43.62           | 40.08 | 37.69   | 14.13       | 54.13     | 68.25     | 68.25      | 72.00      | 82.00 | 73.00  | 73.81 | 73.81 |
| 2020-10-26 | 36.34          | 36.34          | 36.51           | 52.67           | 40.66 | 41.54   | 17.40       | 66.28     | 83.68     | 83.68      | 82.00      | 79.00 | 78.00  | 80.67 | 80.67 |
| 2020-11-02 | 35.15          | 35.15          | 36.01           | 38.88           | 32.92 | 35.74   | 11.78       | 60.66     | 72.44     | 72.44      | 75.00      | 81.00 | 77.00  | 78.36 | 78.36 |
| 2020-11-09 | 35.63          | 35.63          | 37.12           | 39.08           | 37.83 | 37.41   | 17.27       | 61.71     | 78.98     | 78.98      | 82.00      | 79.00 | 75.00  | 78.74 | 78.74 |
| 2020-11-16 | 28.63          | 28.63          | 31.72           | 35.71           | 33.85 | 31.86   | 21.64       | 57.50     | 78.84     | 78.84      | 84.00      | 85.00 | 85.00  | 83.21 | 83.21 |
| 2020-11-23 | 33.28          | 33.28          | 38.48           | 33.13           | 34.31 | 34.80   | 33.95       | 52.70     | 86.49     | 86.49      | 89.00      | 82.00 | 75.00  | 83.13 | 83.13 |
| 2020-11-30 | 42.11          | 42.11          | 46.70           | 35.90           | 36.95 | 40.42   | 37.07       | 38.18     | 75.25     | 75.25      | 83.00      | 83.00 | 83.00  | 79.56 | 79.56 |
| 2020-12-07 | 44.28          | 44.28          | 50.13           | 35.07           | 50.82 | 45.02   | 53.67       | 25.89     | 79.57     | 79.57      | 87.00      | 67.00 | 92.00  | 81.39 | 81.39 |
| 2020-12-13 | 55.61          | 55.61          | 61.21           | 60.98           | 60.92 | 59.68   | 68.05       | 16.95     | 85.00     | 85.00      | 90.00      | 88.00 | 90.00  | 88.25 | 88.25 |
| 2020-12-20 | 57.77          | 57.77          | 65.58           | 59.00           | 61.83 | 61.04   | 75.76       | 9.10      | 84.86     | 84.86      | 93.00      | 92.00 | 90.00  | 89.97 | 89.97 |
| 2020-12-28 | 42.41          | 42.41          | 56.64           | 49.92           | 58.03 | 51.25   | 72.46       | 5.70      | 79.16     | 79.16      | 93.00      | 83.00 | 94.00  | 86.54 | 86.54 |
| 2021-01-04 | 29.57          | 29.57          | 34.91           | 44.30           | 46.48 | 38.86   | 21.74       | 4.50      | 81.36     | 81.36      | 85.00      | 85.00 | 80.00  | 81.07 | 81.07 |
| 2021-01-11 | 24.22          | 24.22          | 29.40           | 31.03           | 24.90 | 27.39   | 65.67       | 3.35      | 70.02     | 70.02      | 78.00      | 74.00 | 67.00  | 73.25 | 73.25 |
| 2021-01-18 | 20.52          | 20.52          | 25.03           | 23.86           | 28.31 | 24.43   | 64.98       | 2.17      | 66.56     | 66.56      | 69.00      | 67.00 | 64.00  | 66.64 | 66.64 |
| 2021-01-25 |                |                | 19.78           | 19.82           | 25.01 | 21.86   |             |           |           |            |            | 64.00 | 61.00  | 64.00 | 63.00 |
| 2021-02-01 |                |                | 19.88           | 19.08           | 9.52  | 16.15   |             |           |           |            |            | 57.00 | 53.00  | 51.00 | 53.67 |
| 2021-02-08 |                |                | 20.91           | 24.70           | 24.71 | 23.44   |             |           |           |            |            | 58.00 | 63.00  | 59.00 | 60.00 |
|            | 100            | 100            |                 |                 |       |         |             |           |           |            |            |       |        |       |       |

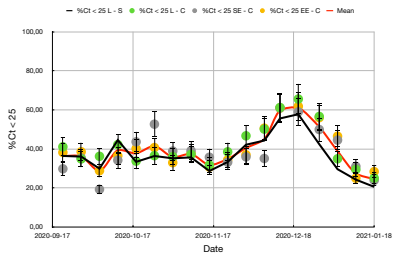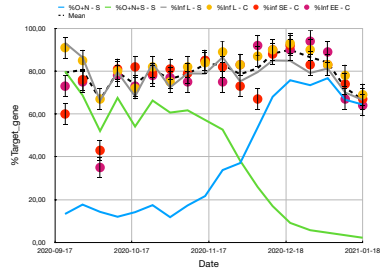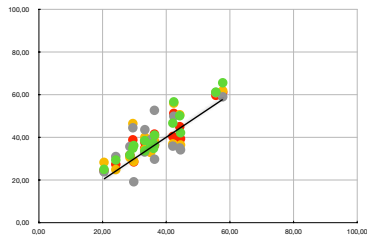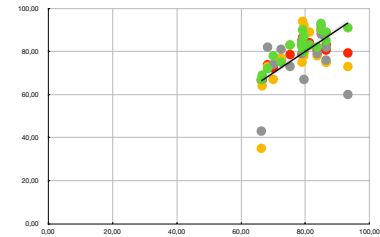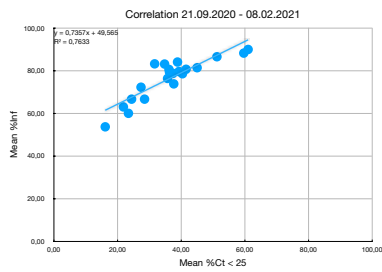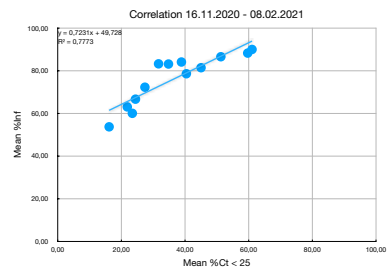

Charlotte

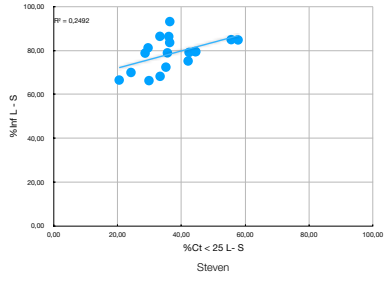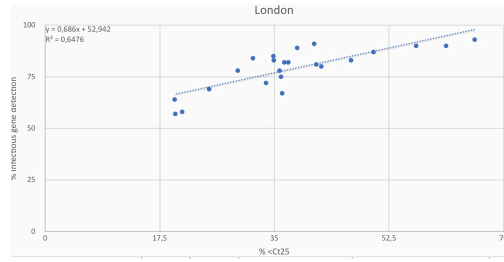

Supplement: Supplementary file [file media-1.pdf]
