# Supplementary material for: An Analysis of PCR Ct Scores and Distributions from the ONS Community Infection Survey during the COVID Second Wave in the UK
Source: bioRxiv or medRxiv preprint supplement (doi:10.1101/2022.06.03.22275903), 2022-06-04

# North

Table 1

| Date       | YH - Ct Pk hi | YH - Ct Pk lo | YH - Ct Pk hi | NW - Ct Pk hi | NW - Ct Pk lo | NE - Ct Pk hi | NE - Ct Pk lo | Mean Ct Pk hi | Mean Ct Pk lo |
|------------|---------------|---------------|---------------|---------------|---------------|---------------|---------------|---------------|---------------|
| 2020-09-07 |               |               |               |               |               |               |               |               |               |
| 2020-09-14 |               |               |               |               |               |               |               |               |               |
| 2020-09-21 | 28,45         | 28,45         | 19,08         | 29,71         | 17,77         | 24,20         |               | 27,46         | 18,42         |
| 2020-09-28 | 30,66         | 30,66         | 18,16         | 30,03         | 19,93         | 27,34         | 19,26         | 29,34         | 19,12         |
| 2020-10-05 | 31,30         | 31,30         | 18,18         | 30,05         | 17,81         | 25,87         | 16,63         | 29,07         | 17,54         |
| 2020-10-12 | 32,26         | 32,26         |               | 31,91         |               | 31,60         | 22,66         | 31,92         | 22,66         |
| 2020-10-19 | 32,90         | 32,90         | 17,90         | 31,01         | 18,76         | 32,72         | 18,30         | 32,21         | 18,32         |
| 2020-10-26 | 32,29         | 32,29         | 18,54         | 30,72         |               | 32,98         | 23,46         | 32,00         | 21,00         |
| 2020-11-02 | 32,62         | 32,62         | 20,44         | 31,96         | 18,79         | 32,08         | 19,39         | 32,22         | 19,54         |
| 2020-11-09 | 32,96         | 32,96         | 19,52         | 32,28         |               | 31,76         | 21,08         | 32,33         | 20,30         |
| 2020-11-16 | 34,22         | 34,22         | 20,79         | 33,22         |               | 32,30         | 18,45         | 33,25         | 19,62         |
| 2020-11-23 | 34,87         | 34,87         |               | 32,93         |               | 33,13         | 25,00         | 33,64         | 25,00         |
| 2020-11-30 | 35,51         | 35,51         |               | 34,48         |               | 33,67         | 30,00         | 34,55         | 30,00         |
| 2020-12-07 | 35,22         | 35,22         | 19,59         | 33,58         | 19,80         | 32,77         |               | 33,86         | 19,70         |
| 2020-12-13 | 33,05         | 33,05         | 19,61         | 32,07         | 17,07         | 30,72         | 16,87         | 31,95         | 17,85         |
| 2020-12-20 | 34,32         | 34,32         | 18,38         | 33,00         | 18,31         | 32,70         | 14,82         | 33,34         | 17,17         |
| 2020-12-28 | 35,27         | 35,27         |               | 33,94         | 17,72         | 33,82         | 17,96         | 34,35         | 17,84         |
| 2021-01-04 | 33,73         | 33,73         | 21,85         | 33,35         |               | 32,73         |               | 31,60         | 21,85         |
| 2021-01-11 | 33,74         | 33,74         | 21,87         | 33,98         |               | 32,89         | 19,05         | 33,54         | 20,46         |
| 2021-01-18 | 34,08         | 34,08         | 23,45         | 33,38         | 19,61         | 33,72         |               | 33,73         | 21,53         |
| 2021-01-25 |               |               |               |               |               |               |               | 32,24         | 20,44         |
| 2021-02-01 |               |               |               |               |               |               |               |               |               |
| 2021-02-08 |               |               |               |               |               |               |               |               |               |

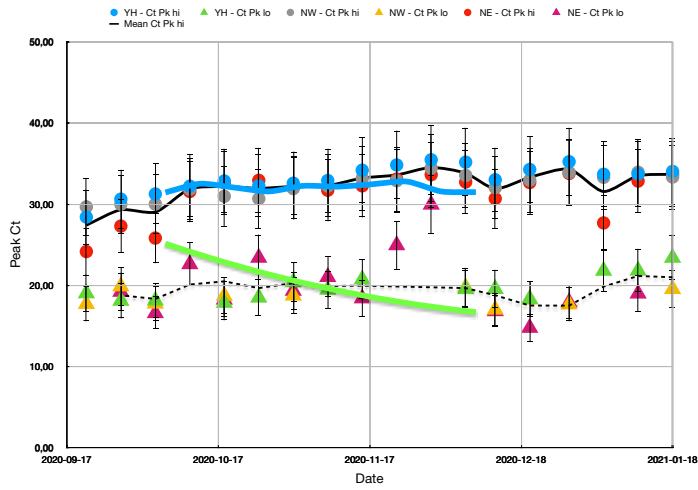

# Midlands

Table 1

| Date       | WM - Ct Pk hi | WM - Ct Pk lo | EM - Ct Pk hi | EM - Ct Pk lo | SW - Ct Pk hi | SW - Ct Pk lo | Mean Ct Pk hi | Mean Ct Pk lo |
|------------|---------------|---------------|---------------|---------------|---------------|---------------|---------------|---------------|
| 2020-09-07 |               |               |               |               |               |               |               |               |
| 2020-09-14 |               |               |               |               |               |               |               |               |
| 2020-09-21 | 28,45         | 14,68         | 30,59         |               | 34,98         | 28,42         | 31,34         | 21,55         |
| 2020-09-28 | 30,88         | 18,03         | 30,87         | 20,67         | 31,22         | 20,59         | 30,99         | 19,76         |
| 2020-10-05 | 33,01         | 17,40         | 31,73         | 17,95         | 34,32         | 24,95         | 33,02         | 20,10         |
| 2020-10-12 | 27,48         |               | 32,61         | 23,63         | 30,24         |               | 30,11         | 23,63         |
| 2020-10-19 | 30,22         | 18,89         | 32,30         | 18,21         | 30,85         |               | 31,12         | 18,55         |
| 2020-10-26 | 31,73         | 18,57         | 32,28         | 23,60         | 31,77         | 23,33         | 31,93         | 21,83         |
| 2020-11-02 | 31,71         | 21,31         | 32,56         |               | 32,69         |               | 32,32         | 21,31         |
| 2020-11-09 | 32,31         |               | 32,85         | 18,46         | 33,61         | 19,54         | 32,92         | 19,00         |
| 2020-11-16 | 33,21         |               | 34,03         |               | 31,09         | 19,53         | 32,77         | 19,53         |
| 2020-11-23 | 30,43         |               | 34,01         |               | 33,57         | 27,94         | 32,67         | 27,94         |
| 2020-11-30 | 32,56         |               | 33,99         | 23,61         | 33,24         | 21,99         | 33,26         | 22,90         |
| 2020-12-07 | 33,46         | 21,83         | 33,07         | 27,39         | 34,16         | 31,34         | 33,56         | 26,85         |
| 2020-12-13 | 31,91         |               | 32,46         | 17,47         | 33,83         | 17,26         | 32,73         | 17,37         |
| 2020-12-20 | 31,89         | 18,43         | 33,04         | 15,36         | 33,81         | 27,24         | 32,91         | 20,34         |
| 2020-12-28 | 32,49         | 17,79         | 33,02         | 18,94         | 34,73         |               | 33,41         | 18,37         |
| 2021-01-04 |               | 22,67         | 33,30         | 17,42         | 32,52         | 16,58         | 32,91         | 18,89         |
| 2021-01-11 | 32,45         | 18,68         | 33,29         |               | 33,44         |               | 33,06         | 18,68         |
| 2021-01-18 | 33,66         |               | 30,59         |               | 34,36         |               | 32,87         |               |
| 2021-01-25 |               |               |               |               |               |               | 32,44         | 20,88         |
| 2021-02-01 |               |               |               |               |               |               |               | 20,12         |
| 2021-02-08 |               |               |               |               |               |               |               |               |

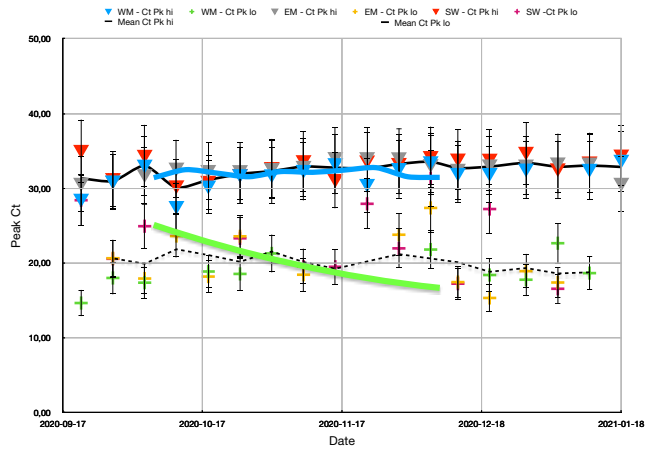

# LSE

Table 1

| Date       | L - Ct Pk hi | L - Ct Pk lo | SE - Ct Pk hi | Se - Ct Pk lo | EE - Ct Pk hi | EE - Ct Pk lo | Mean Ct Pk hi | Mean Ct Pk lo |
|------------|--------------|--------------|---------------|---------------|---------------|---------------|---------------|---------------|
| 2020-09-07 |              |              |               |               |               |               |               |               |
| 2020-09-14 |              |              |               |               |               |               |               |               |
| 2020-09-21 | 29,42        | 21,46        | 35,95         | 25,64         | 33,13         | 24,06         | 32,83         | 23,72         |
| 2020-09-28 | 32,82        | 25,78        | 33,47         |               | 34,38         | 22,50         | 33,56         | 24,14         |
| 2020-10-05 | 34,70        | 20,61        | 34,43         | 25,68         | 34,38         | 22,19         | 34,50         | 22,82         |
| 2020-10-12 | 34,12        | 19,42        | 33,20         | 25,70         | 33,13         | 20,31         | 33,48         | 21,81         |
| 2020-10-19 | 35,07        | 21,60        | 32,59         | 19,77         | 33,44         | 20,31         | 33,70         | 20,56         |
| 2020-10-26 | 33,27        |              | 28,23         | 17,30         | 32,81         | 19,38         | 31,44         | 18,34         |
| 2020-11-02 | 33,31        |              | 30,13         |               | 33,44         |               | 32,29         |               |
| 2020-11-09 | 33,65        | 20,18        | 33,58         | 18,27         | 34,06         | 19,06         | 33,76         | 19,17         |
| 2020-11-16 | 33,69        |              | 32,66         | 20,47         | 32,50         | 22,19         | 32,95         | 21,33         |
| 2020-11-23 | 30,66        | 19,94        | 33,31         | 20,18         | 33,13         | 20,63         | 32,36         | 20,25         |
| 2020-11-30 | 33,76        | 19,67        | 34,26         | 23,95         | 31,56         | 20,94         | 33,19         | 21,52         |
| 2020-12-07 | 32,57        | 17,88        | 34,28         | 20,22         | 30,63         |               | 32,49         | 19,05         |
| 2020-12-13 |              | 16,07        | 32,11         | 16,49         | 31,88         | 15,63         | 31,99         | 16,06         |
| 2020-12-20 |              | 18,25        | 31,82         | 17,13         | 31,88         | 16,25         | 31,85         | 17,21         |
| 2020-12-28 | 32,98        |              | 33,71         | 18,40         | 28,13         | 18,13         | 31,61         | 18,26         |
| 2021-01-04 | 33,02        |              | 30,60         |               | 30,63         | 17,81         | 31,42         | 17,81         |
| 2021-01-11 | 35,20        | 21,42        | 34,69         |               | 34,69         |               | 34,86         | 21,42         |
| 2021-01-18 | 34,93        | 21,76        | 35,02         |               | 34,38         |               | 34,77         | 21,76         |
| 2021-01-25 |              |              |               |               |               |               | 32,95         | 20,31         |
| 2021-02-01 |              |              |               |               |               |               |               |               |
| 2021-02-08 |              |              |               |               |               |               |               |               |

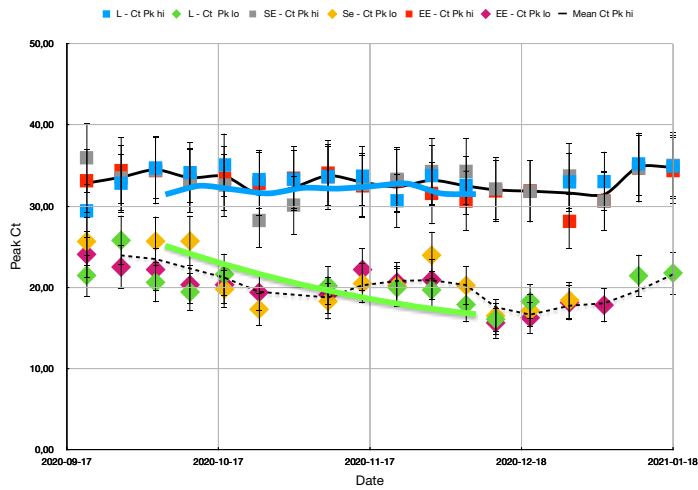

Supplement: Supplementary file [file media-2.pdf]
